# Supplementary material for: Oxidation of isoprene by titanium oxide cluster cations in the gas phase
Source: Royal Society of Chemistry journal article supplement (doi:10.1039/d0cp05472k), 2020-01-01
Supplement: d0cp05472k1.pdf [file d0cp05472k1.pdf]

## Supporting Information

### **Oxidation of Isoprene by Titanium Oxide Cluster Cations in the Gas Phase**

Shu-Qiang Li,<sup>a</sup> Shi-Ying Lv,<sup>b,c</sup> Hai-Yan Zhou,<sup>a</sup> Yong-Qi Ding,<sup>a</sup> Qing-Yu Liu<sup>b</sup> and  
Jia-Bi Ma<sup>\*a</sup>

<sup>a</sup> Key Laboratory of Cluster Science of Ministry of Education, Beijing Key Laboratory of Photoelectronic/Electrophotonic Conversion Materials, School of Chemistry and Chemical Engineering, Beijing Institute of Technology, Beijing 100081, China.

<sup>b</sup> State Key Laboratory for Structural Chemistry of Unstable and Stable Species, Institute of Chemistry, Chinese Academy of Sciences, Beijing 100190, China.

<sup>c</sup> University of Chinese Academy of Sciences, Beijing 100049, P. R. China.

\* E-mail: majiabi@bit.edu.cn

## Table of Contents

1. Additional time-of-flight (TOF) mass spectra. (pages S3-S6)
2. Variations of the relative intensities of the reactant and product cluster ions in the reactions. (page S7)
3. The reaction channels and the pseudo first-order rate constants ( $k_1$ ). (pages S8-S9)
4. DFT-calculated structures of  $C_3H_4O$ ,  $C_5H_6O$ , and  $C_5H_7O$ . (pages S10-S11)
5. Comparison of neutral products of  $C_5H_8$  oxidation. (page S12)
6. References. (page S13)

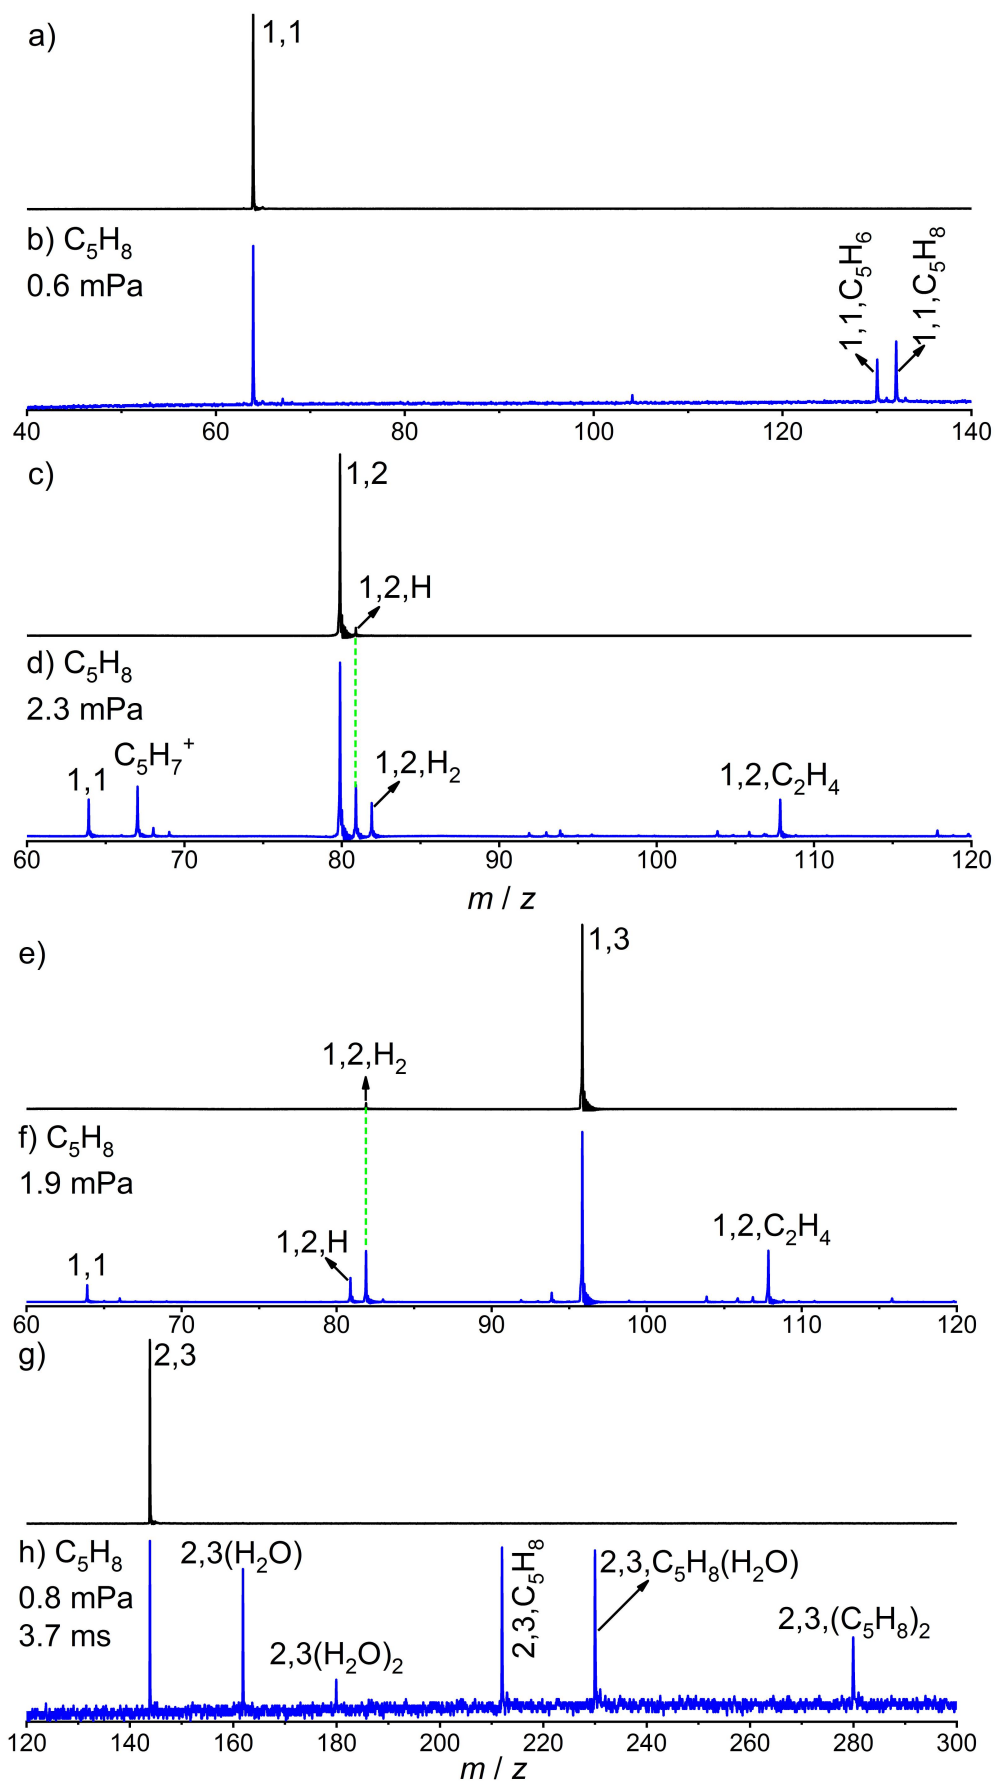

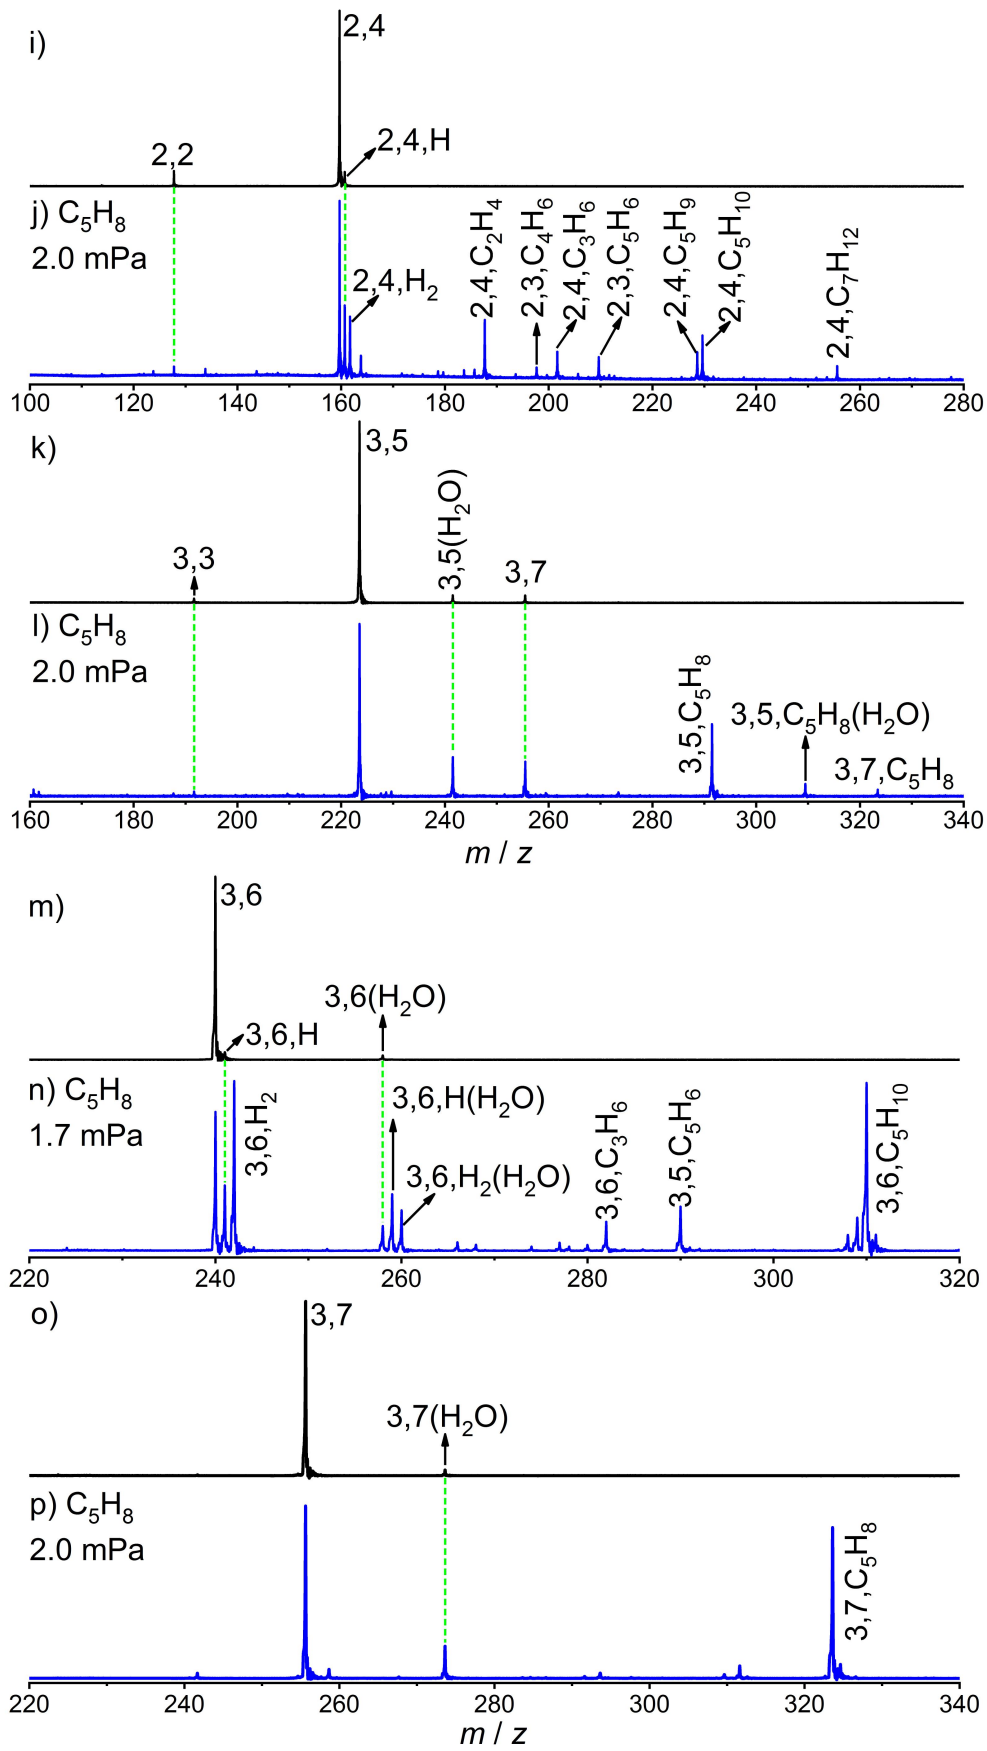

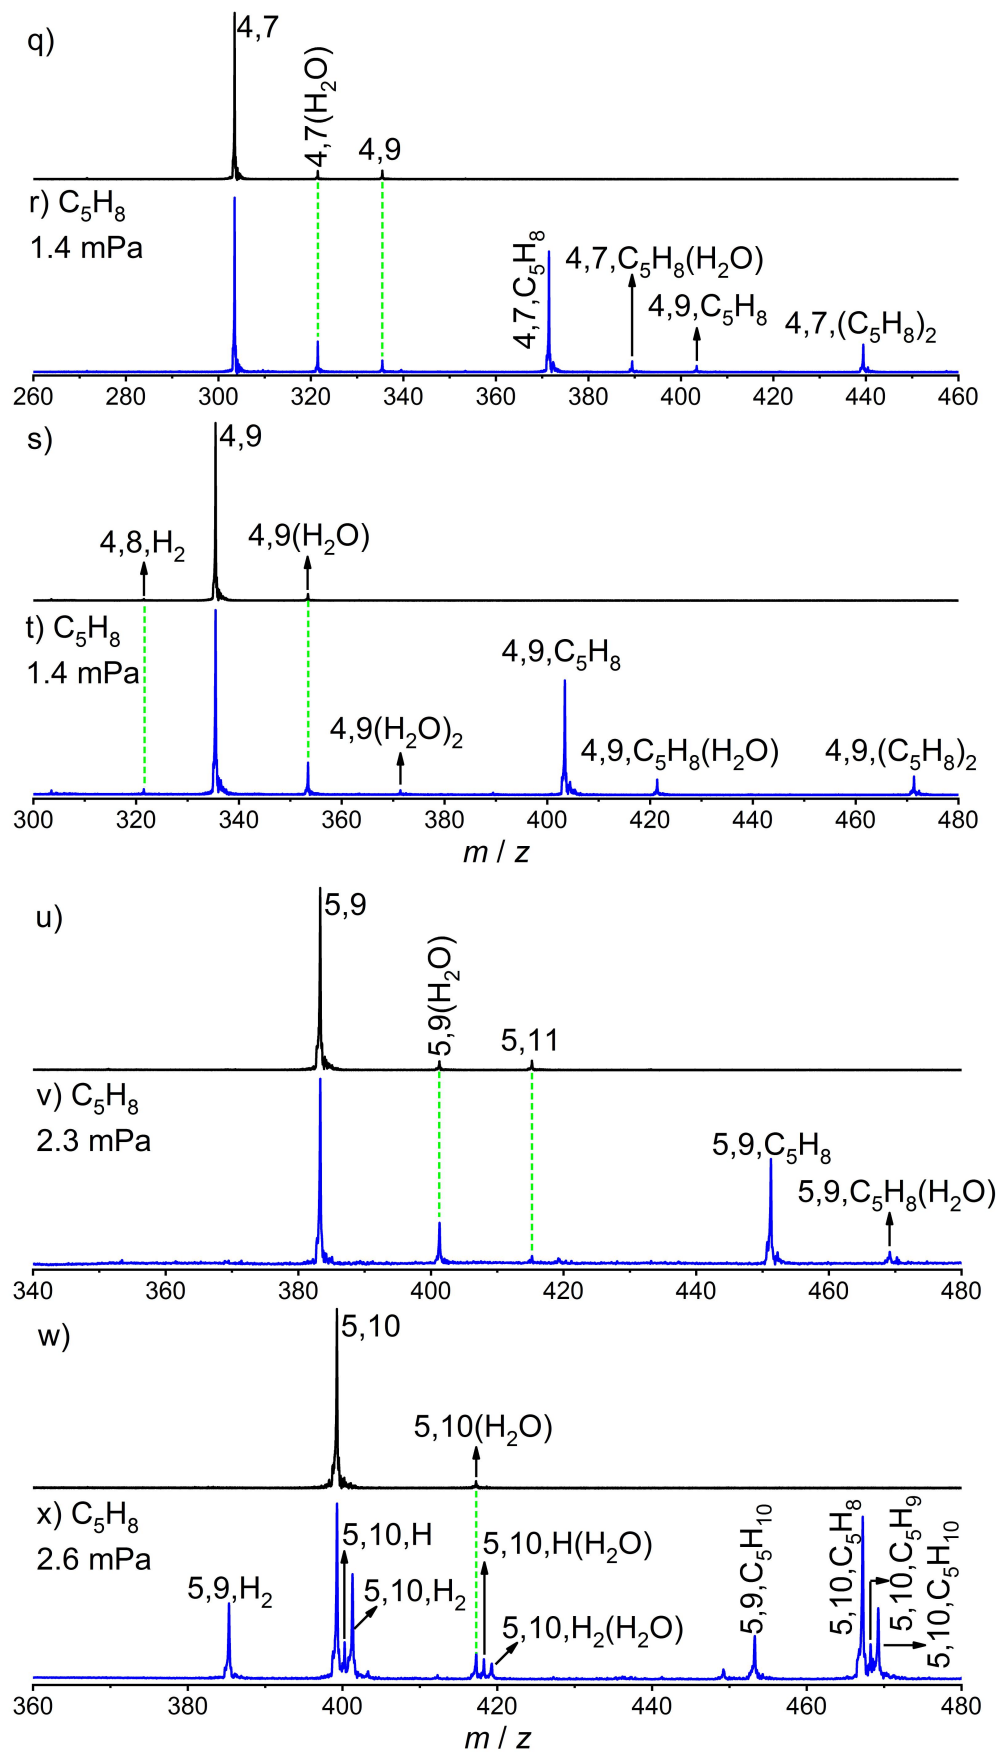

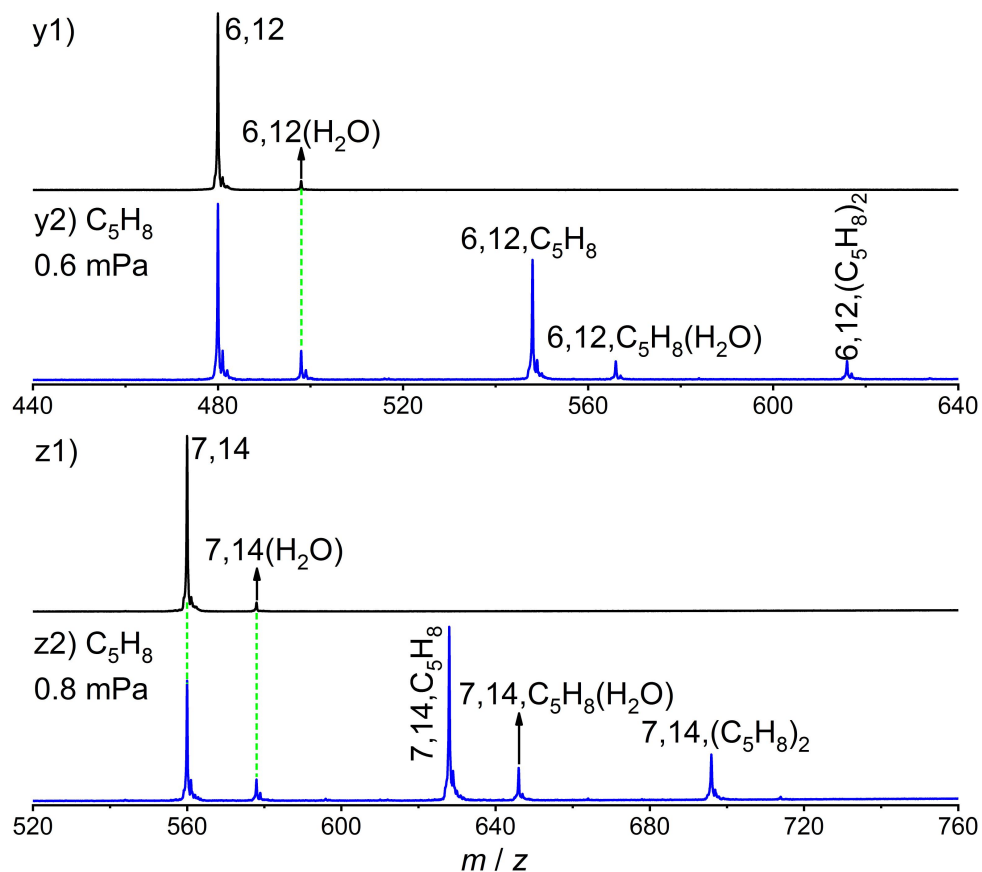

**Fig. S1** TOF mass spectra for the reactions of mass-selected  $\text{Ti}_x\text{O}_y^+$  cations (panels a, c, e, g, i, k, m, o, q, s, u, w, y1, and z1) with  $\text{C}_5\text{H}_8$  (panels b, d, f, h, g, l, n, p, r, t, v, x, y2, and z2). The time periods for the reactions are 3.7 ms in h) and 1.7 ms in the other panels. The  $\text{C}_5\text{H}_8$  pressures are given. The  $\text{Ti}_x\text{O}_y\text{Z}^+$  ( $Z = \text{C}_2\text{H}_4, \text{C}_4\text{H}_6,$  or other  $\text{C}_m\text{H}_n$ ) species are labeled as “x,y,Z”.

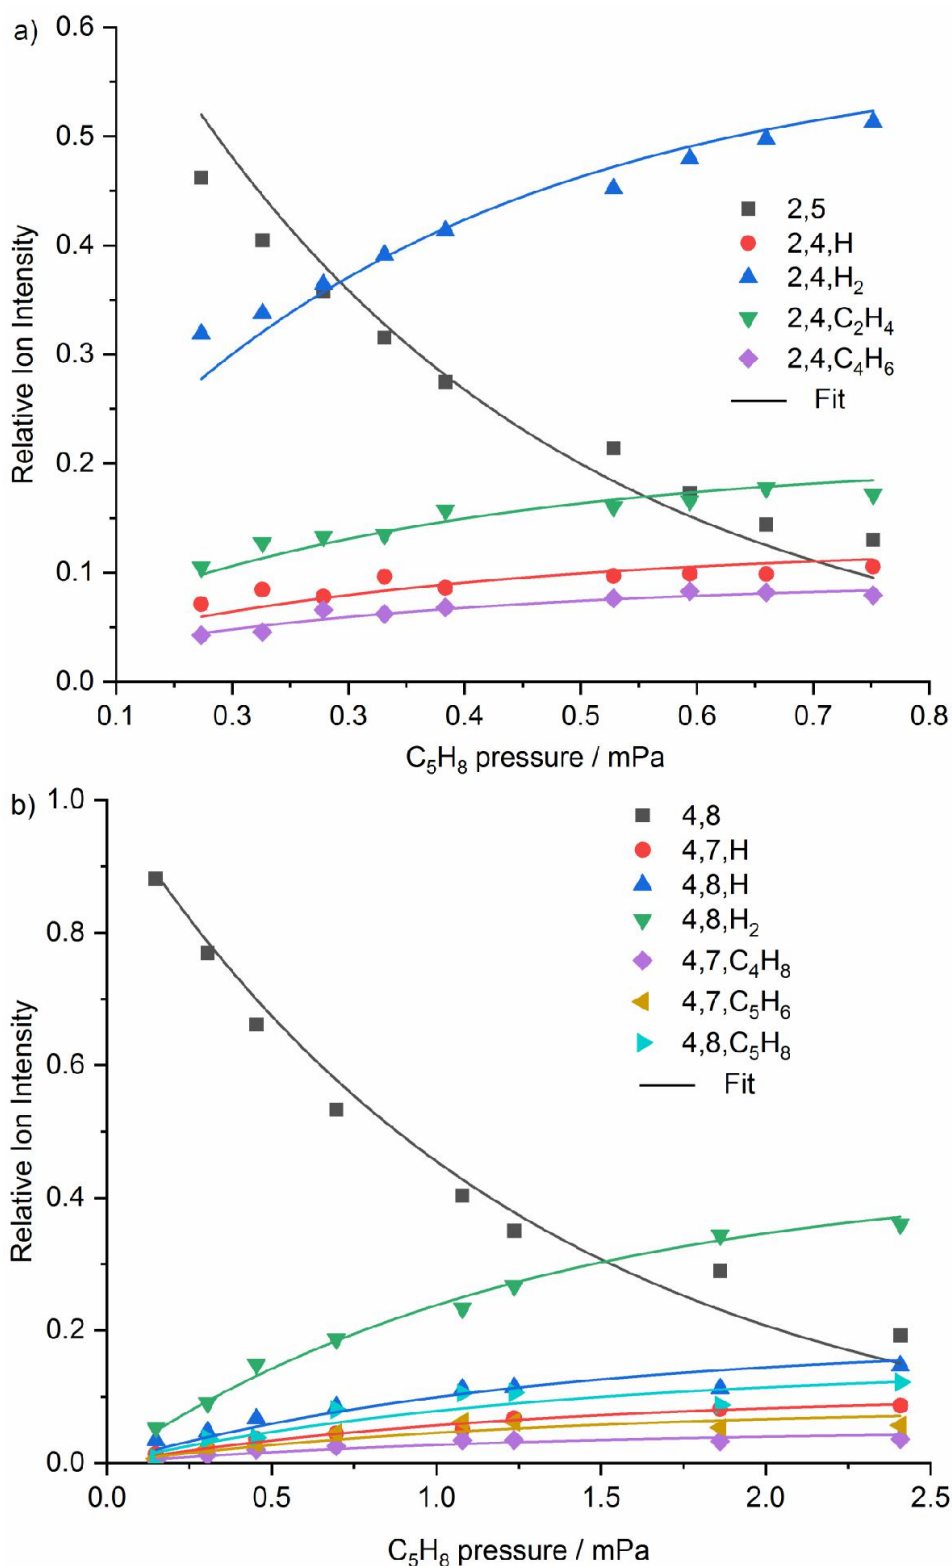

**Fig. S2** Variations of the relative ion intensities with respect to the  $C_5H_8$  pressures in the reactions of (a)  $Ti_2O_5^+$  and  $C_5H_8$  for 3.7 ms, (b)  $Ti_4O_8^+$  and  $C_3H_6$  for 1.7 ms, respectively. The  $Ti_xO_yZ^+$  ( $Z = C_2H_4, C_4H_6, C_4H_8, C_5H_6, \text{ or } C_5H_8$ ) species are labeled as “ $x,y,Z$ ”.

**Table S1.** The reaction channels of  $\text{Ti}_x\text{O}_y^+$  clusters with isoprene and the pseudo first-order rate constants ( $k_1$ ) (in  $10^{-9} \text{ cm}^3 \text{ molecule}^{-1} \text{ s}^{-1}$ ).

| $x$ | $y$ | $\Delta^{[a]}$ | Reaction Channel Types |   |   |   |   | $k_1$ | $\vartheta^{[b]}$ |
|-----|-----|----------------|------------------------|---|---|---|---|-------|-------------------|
|     |     |                | 1                      | 2 | 3 | 4 | 5 |       |                   |
| 1   | 1   | -1             | √                      | √ | × | × | × | 3.0   | 220%              |
| 1   | 2   | 1              | ×                      | √ | √ | × | × | 1.8   | 139%              |
| 1   | 3   | 3              | ×                      | × | × | √ | √ | 2.7   | 218%              |
| 2   | 3   | -1             | √                      | × | × | × | × |       |                   |
| 2   | 4   | 1              | ×                      | √ | √ | √ | √ | 2.8   | 247%              |
| 2   | 5   | 3              | ×                      | × | × | √ | √ | 2.6   | 238%              |
| 3   | 5   | -1             | √                      | × | × | × | × |       |                   |
| 3   | 6   | 1              | ×                      | √ | √ | √ | × | 2.6   | 242%              |
| 3   | 7   | 3              | √                      | × | × | × | × |       |                   |
| 4   | 7   | -1             | √                      | × | × | × | × |       |                   |
| 4   | 8   | 1              | √                      | √ | × | √ | √ | 2.0   | 196%              |
| 4   | 9   | 3              | √                      | × | × | × | × |       |                   |
| 5   | 9   | -1             | √                      | × | × | × | × |       |                   |
| 5   | 10  | 1              | √                      | √ | × | √ | × | 2.7   | 263%              |
| 6   | 12  | 1              | √                      | × | × | × | × |       |                   |
| 7   | 14  | 1              | √                      | × | × | × | × |       |                   |

<sup>[a]</sup>  $\Delta=2y-nx+q$ ,  $q$ : the charge number,  $n$ : the highest oxidation state of element Ti.

<sup>[b]</sup> Reaction efficiency is defined as  $\vartheta = (k_1/k_{\text{calc}}) \times 100\%$  and  $k_{\text{calc}}$  is the theoretical rate of collision that is calculated with  $k_{\text{calc}} = 2\pi(e^2\alpha/\mu)^{1/2}$ , in which  $e$  is the charge of the



cluster ion,  $\alpha$  is the electric polarizability of the reactant molecule, and  $\mu$  is the reduced mass.<sup>1</sup>

(a)  $C_3H_4O$

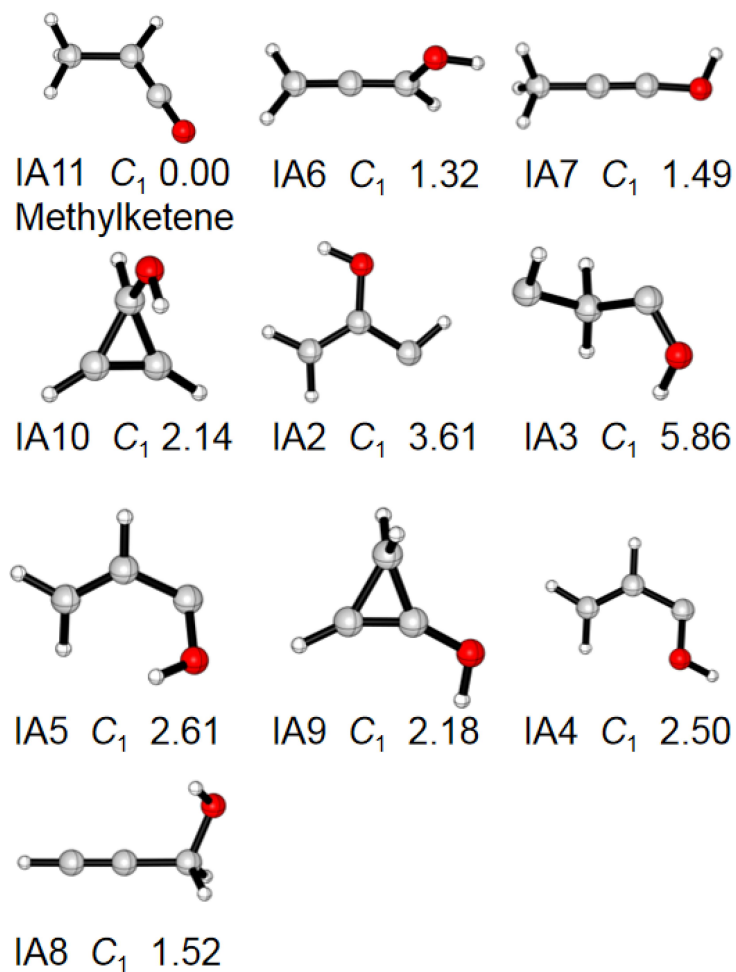

(b)  $C_5H_6O$

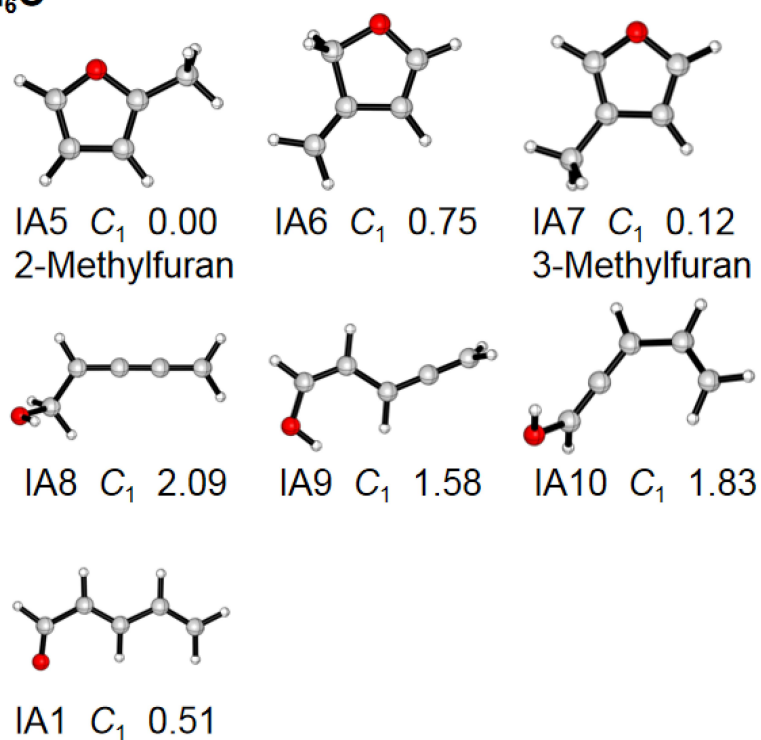

(c) C<sub>5</sub>H<sub>7</sub>O

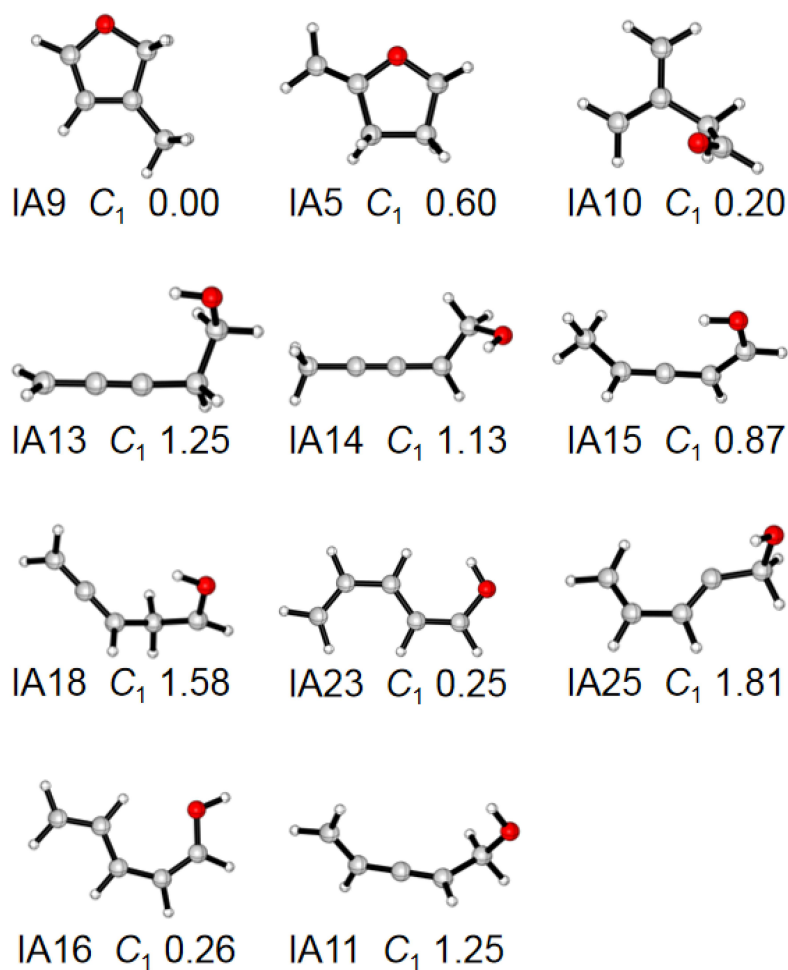

**Fig. S3** DFT-calculated structures of neutral products (a) C<sub>3</sub>H<sub>4</sub>O, (b) C<sub>5</sub>H<sub>6</sub>O, and (c) C<sub>5</sub>H<sub>7</sub>O of the reaction  $\text{Ti}_2\text{O}_5^+ + \text{C}_5\text{H}_8$ . The spin states of (a) C<sub>3</sub>H<sub>4</sub>O and (b) C<sub>5</sub>H<sub>6</sub>O are singlet, and that of (c) C<sub>5</sub>H<sub>7</sub>O is doublet. The zero-point vibration-corrected energies ( $\Delta H_{0\text{K}}$  in eV) of the possible products with respect to the separated reactants  $\text{Ti}_2\text{O}_5^+$  and  $\text{C}_5\text{H}_8$  are given.

**Table S2.** Comparison of neutral products of C<sub>5</sub>H<sub>8</sub> oxidation mediated by Ti<sub>x</sub>O<sub>y</sub><sup>+</sup> cations and TiO<sub>2</sub> surfaces.

| Product Type          | Neutral Products                                                            |                                  |
|-----------------------|-----------------------------------------------------------------------------|----------------------------------|
|                       | Ti <sub>x</sub> O <sub>y</sub> <sup>+</sup> + C <sub>5</sub> H <sub>8</sub> | TiO <sub>2</sub> surfaces        |
| Hydrocarbon Compounds | C <sub>5</sub> H <sub>7</sub>                                               | Propanal                         |
|                       | C <sub>5</sub> H <sub>6</sub>                                               |                                  |
|                       | C <sub>2</sub> H <sub>2</sub> (Acetylene)                                   |                                  |
|                       | C <sub>3</sub> H <sub>4</sub> (Propyne)                                     |                                  |
|                       | C <sub>3</sub> H <sub>6</sub> (Propylene)                                   |                                  |
| Carbonyl Compounds    | CH <sub>2</sub> O (Formaldehyde)                                            | CH <sub>2</sub> O (Formaldehyde) |
|                       |                                                                             | Butanal/butanone                 |
|                       |                                                                             | methacrolein, MACR               |
|                       |                                                                             | Pentanal                         |
|                       |                                                                             | Acetone                          |
|                       | C <sub>3</sub> H <sub>4</sub> O (Methylketene)                              | methyl vinyl ketone, MVK         |
| Others                | CO                                                                          | CO <sub>2</sub>                  |
|                       | H <sub>2</sub> O                                                            |                                  |
|                       | C <sub>5</sub> H <sub>6</sub> O (2-Methylfuran)                             |                                  |
|                       | C <sub>5</sub> H <sub>7</sub> O                                             | Acetaldehyde                     |
|                       |                                                                             |                                  |

## References

1. G. Kummerlowe and M. K. Beyer, *Int. J. Mass Spectrom.*, 2005, **244**, 84-90.
